# Supplementary material
Source: Springer Nature journal article supplement (https://www.springermedizin.de/resource/supplementary/13019_2013_1427_MOESM2_ESM.pdf/9640642)
Supplement: MOESM2 [file 9640642]

| Model  | Study name  | Statistics for each study |                |          |             |             |         |         | Std diff in means and 95% CI |       |      |      |      |
|--------|-------------|---------------------------|----------------|----------|-------------|-------------|---------|---------|------------------------------|-------|------|------|------|
|        |             | Std diff in means         | Standard error | Variance | Lower limit | Upper limit | Z-Value | p-Value | -2.00                        | -1.00 | 0.00 | 1.00 | 2.00 |
|        | chenshaolia | -0.646                    | 0.243          | 0.059    | -1.122      | -0.171      | -2.663  | 0.008   |                              |       |      |      |      |
|        | noguchi     | -0.341                    | 0.136          | 0.019    | -0.608      | -0.073      | -2.499  | 0.012   |                              |       |      |      |      |
|        | Yixianhua   | -1.330                    | 0.087          | 0.008    | -1.501      | -1.159      | -15.246 | 0.000   |                              |       |      |      |      |
| Fixed  |             | -1.009                    | 0.070          | 0.005    | -1.147      | -0.872      | -14.351 | 0.000   |                              |       |      |      |      |
| Random |             | -0.782                    | 0.366          | 0.134    | -1.499      | -0.065      | -2.137  | 0.033   |                              |       |      |      |      |
